# Supplementary material for: Temporal Study of Salmonella enterica Serovars Isolated from Fluff Samples from Ontario Poultry Hatcheries between 2009 and 2018
Source: MDPI journal article supplement (doi:10.3390/pathogens11010009), 2021-12-22
Supplement: s1 [file s1]

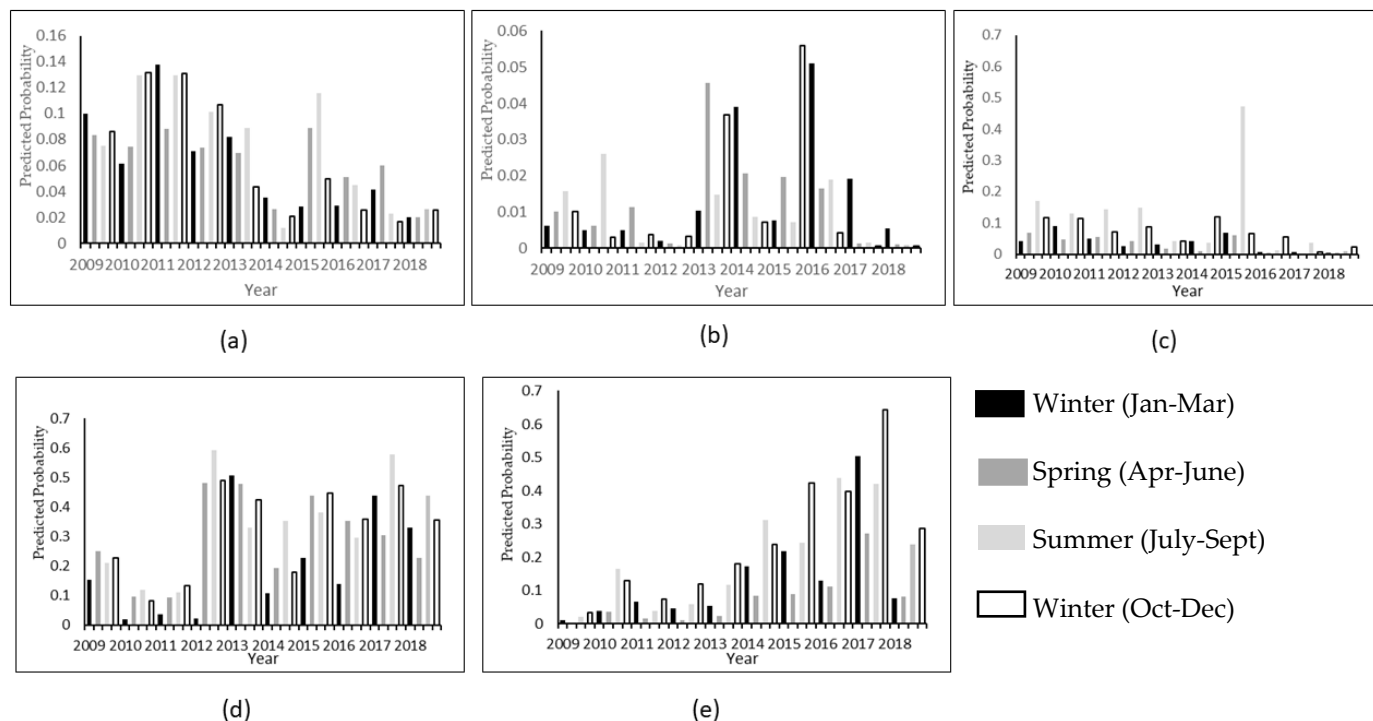

**Figure S1:** Predicted probability of *Salmonella enterica* isolated from fluff samples submitted through the Ontario Hatchery and Supply Flock Policy between 2009 and 2018, by poultry commodity (a=broiler hatcheries, b=layer hatcheries, c=turkey hatcheries, d=waterfowl hatcheries, and e=game bird hatcheries). The y-axis scale may differ between graphs so that details can be observed.
